1 **BORCS6 is involved in the enlargement of lung lamellar bodies in *Lrrk2* knockout**  
2 **mice**

3

4 Miho Araki<sup>1</sup>, Sho Takatori<sup>1</sup>, Genta Ito<sup>2\*</sup>, and Taisuke Tomita<sup>1,2\*</sup>

5

6 1. Laboratory of Neuropathology and Neuroscience, Graduate School of  
7 Pharmaceutical Sciences, The University of Tokyo, Tokyo 113-0033, Japan

8 2. Social Cooperation Program of Brain and Neurological Disorders, Graduate School  
9 of Pharmaceutical Sciences, The University of Tokyo, Tokyo 113-0033, Japan

10

11 **ORCID identifiers:**

12 Miho Araki, 0000-0002-9516-6868

13 Sho Takatori, 0000-0002-3925-4011

14 Genta Ito, 0000-0001-6370-1099

15 Taisuke Tomita, 0000-0002-0075-5943

16

17 **\*Corresponding authors:**

18 Genta Ito

19 Social Cooperation Program of Brain and Neurological Disorders, Graduate School of  
20 Pharmaceutical Sciences, The University of Tokyo, 7-3-1 Hongo, Bukyoku, Tokyo 113-  
21 0033, Japan

22 Phone: +81-(0)3-5841-4877

23 Email: [genta@mol.f.u-tokyo.ac.jp](mailto:genta@mol.f.u-tokyo.ac.jp)

24

25 Taisuke Tomita

26 Laboratory of Neuropathology and Neuroscience, Graduate School of Pharmaceutical  
27 Sciences, The University of Tokyo, 7-3-1 Hongo, Bunkyo, Tokyo 113-0033, Japan  
28 Phone: +81-(0)3-5841-4868  
29 Email: [taisuke@mol.f.u-tokyo.ac.jp](mailto:taisuke@mol.f.u-tokyo.ac.jp)

30

31 **Abstract (175 words)**

32 Leucine-rich repeat kinase 2 (LRRK2) has been implicated in the pathogenesis of  
33 Parkinson disease. It has been shown that *Lrrk2* knockout (KO) rodents have enlarged  
34 lamellar bodies (LBs) in their alveolar epithelial type II cells, although the underlying  
35 mechanisms remain unclear. Here we performed proteomic analyses on LBs isolated from  
36 *Lrrk2* KO mice and found that the LB proteome is substantially different in *Lrrk2* KO  
37 mice compared with wild-type mice. In *Lrrk2* KO LBs, several Rab proteins were  
38 increased, and subunit proteins of BLOC-1-related complex (BORC) were decreased. The  
39 amount of surfactant protein C was significantly decreased in the bronchoalveolar lavage  
40 fluid obtained from *Lrrk2* KO mice, suggesting that LB exocytosis is impaired in *Lrrk2*  
41 KO mice. We also found that the enlargement of LBs is recapitulated in A549 cells upon  
42 KO of *LRRK2* or by treating cells with LRRK2 inhibitors. Using this model, we show  
43 that KO of *BORCS6*, a BORC subunit gene, but not other BORC genes, causes LB  
44 enlargement. Our findings implicate the LRRK2-BORCS6 pathway in the maintenance  
45 of LB morphology.

46

47 **Keywords:**

48 BLOC-1-related complex subunit 6/leucine-rich repeat kinase 2/lung lamellar body

49

## 50 Introduction

51 Parkinson disease (PD) is a neurodegenerative disorder characterized by the  
52 selective loss of dopaminergic neurons in the substantia nigra, Lewy body formation in  
53 the remaining neurons, and the impairment of motor functions, including bradykinesia,  
54 rigidity, resting tremor, and postural instability (Sveinbjornsdottir, 2016). Leucine-rich  
55 repeat kinase 2 (LRRK2) has been identified as one of the most common genetic causes  
56 of familial PD (Paisán-Ruíz *et al*, 2004; Zimprich *et al*, 2004). Genome-wide association  
57 studies identified the association of the *LRRK2* locus with an increased risk of sporadic  
58 PD (Satake *et al*, 2009; Simón-Sánchez *et al*, 2009).

59 LRRK2 consists of 2,527 amino acids, and contains several functional domains, such  
60 as a guanosine triphosphate (GTP)-binding domain and a kinase domain (Civiero *et al*,  
61 2012; Mills *et al*, 2012; Vancraenenbroeck *et al*, 2012). It has been suggested that LRRK2  
62 is involved in autophagy, intracellular vesicle trafficking, inflammatory responses, and  
63 synaptic transmission (Araki *et al*, 2018). Recently, small Rab GTPases, including  
64 Rab3A/B/C/D, Rab5, Rab8A/B, Rab10, Rab12, Rab35, and Rab43 have been identified  
65 as physiological substrates of LRRK2 (Steger *et al*, 2016; Ito *et al*, 2016). LRRK2  
66 phosphorylates these proteins at a serine or threonine residue within their switch II  
67 domain, thereby regulating the interaction of Rab proteins with their regulatory factors as  
68 well as effector proteins. Phosphorylation of these Rab proteins by LRRK2 has been  
69 shown to regulate various cellular functions, including the regulation of primary cilia,  
70 lipid storage, and the homeostasis of stressed lysosomes (Yu *et al*, 2018; Eguchi *et al*,  
71 2018; Steger *et al*, 2017).

72 LRRK2 is highly expressed in the brain, kidney, lung, and immune cells (Giasson *et*  
73 *al*, 2006). Although *Lrrk2* knockout (KO) mice did not show any notable changes in the

74 brain, a substantial enlargement of secondary lysosomes in renal proximal tubule cells  
75 and lung lamellar bodies (LBs) in alveolar epithelial type 2 (AT2) cells was observed  
76 (Herzig *et al*, 2011). Moreover, mice, rats, as well as nonhuman primates administered  
77 with selective LRRK2 kinase inhibitors showed a similar enlargement of LBs in AT2 cells  
78 (Fuji *et al*, 2015; Harney *et al*, 2020; Andersen *et al*, 2018). These observations led us to  
79 hypothesize that LRRK2 plays an important role in regulating LBs. LB enlargement was  
80 observed in *Rab38* KO mice, presumably due to a decrease in LB exocytosis (Osanai *et*  
81 *al*, 2010). However, the molecular mechanisms underlying the enlargement of LBs in  
82 *Lrrk2* KO mice remains unknown.

83 Pulmonary surfactant is a mixture of proteins and lipids, and forms a layer on the  
84 surface of alveoli to prevent them from collapse during respiration. Lung LBs play an  
85 important role in the synthesis, storage, and secretion of pulmonary surfactant  
86 (Wadsworth *et al*, 1997). LBs are lysosome-related organelles that exist specifically in  
87 lung AT2 cells (Weaver *et al*, 2002). Similar to lysosomes, LBs express lysosomal-  
88 associated membrane protein 1 (LAMP1) and CD63, contain soluble degradative  
89 enzymes, such as cathepsin C, and have an acidic pH (Hook & Gilmore, 1982). Although  
90 the molecular mechanisms of LB exocytosis are not fully understood, lysosomal  
91 exocytosis has been relatively well studied. Lysosomal exocytosis requires two sequential  
92 steps; i.e., transport to the cell periphery, and fusion with the plasma membrane  
93 (Encarnaç o *et al*, 2016). Recent studies have reported that biogenesis of lysosome-  
94 related organelles complex (BLOC) one-related complex (BORC) plays an essential role  
95 in the anterograde transport of lysosomes (Pu *et al*, 2015). Given the similarities of LBs  
96 to lysosomes, it is possible that LB exocytosis also depends on BORC.

97 Therefore, in this study we performed proteomic analysis on mouse LBs isolated

98 from wild-type (WT) and *Lrrk2* KO mice. Our results showed that in *Lrrk2* KO mice,  
99 several Rab proteins, including Rab3A, Rab3D, and Rab27A were significantly increased,  
100 and subunit proteins of BORC, including Borcs6, were significantly decreased.  
101 Furthermore, we established a cellular model in A549, a cancer cell line that originated  
102 from a human lung, to evaluate LB enlargement. Using these cells, we observed LB  
103 enlargement in *BORCS6* KO cells. This effect was rescued by BORCS6 overexpression.  
104 Our results hence demonstrated that BORCS6 plays an important role in maintaining the  
105 morphology of LBs.

106

## 107 **Results and Discussion**

### 108 Lamellar body enlargement in *Lrrk2* KO mice

109 Although several studies have demonstrated that LBs existing in AT2 cells are  
110 enlarged in *Lrrk2* KO rodents (Herzig *et al*, 2011), this has not been validated  
111 quantitatively. Therefore, we performed electron microscopy on the lung of 2-month-old  
112 mice (Figure 1A). In *Lrrk2* KO mice, we found that LBs occupied most of the cytoplasm  
113 of AT2 cells, and other organelles were hardly observed. The area occupied by LBs in the  
114 electron micrographs was significantly increased in *Lrrk2* KO mice compared with WT  
115 mice (Figure 1B). These results indicate that LBs of *Lrrk2* KO mice are significantly  
116 larger than those of WT mice. In *Lrrk2* KO mice, the levels of surfactant protein C (Sftpc)  
117 in the bronchoalveolar lavage fluid (BALF) measured by the enzyme-linked  
118 immunosorbent assay were significantly decreased compared with WT mice (Figure 1C).  
119 As Sftpc is secreted by the exocytosis of LBs, this result suggested that LB exocytosis is  
120 impaired in *Lrrk2* KO mice.

121

### 122 Isolation of lamellar bodies from *Lrrk2* KO mice

123 Given that LRRK2 is involved in the regulation of intracellular trafficking, we  
124 hypothesized that proteins responsible for the enlargement of LBs might have an altered  
125 localization to/from LBs in *Lrrk2* KO mice. To elucidate this hypothesis, we performed  
126 liquid chromatography-tandem mass spectrometry (LC-MS/MS) analysis on LBs isolated  
127 from mouse lungs. We isolated LBs by sucrose gradient centrifugation (Figure 2A) and  
128 confirmed the enrichment of LBs in one of the fractions by immunoblotting (Figure 2B).  
129 As a marker of LBs, we used ATP-binding cassette sub-family A member 3 (Abca3),  
130 which is an ABC transporter that specifically localizes to LB membranes. We also

131 analyzed the expression of phospholipid-transporting ATPase IA (Atp8a1) as well as  
132 lysosome-associated membrane glycoprotein 1 (Lamp1), which are proteins abundantly  
133 expressed in the LB membranes (Ridsdale *et al*, 2011). We used Rab5 and receptor-  
134 binding cancer antigen expressed on SiSo cells (Rcas1) as markers of early endosomes  
135 and the Golgi apparatus, respectively. LB proteins were detected in the 0.4 to 0.5 M  
136 sucrose fraction (Figure 2B; lane 8), whereas Rab5 and Rcas1 were not, suggesting that  
137 LBs were selectively enriched in this fraction. Notably, LRRK2 was not detected in the  
138 LB fraction (Figure 2B).

139

#### 140 Substantial changes in the lamellar body proteome in *Lrrk2* KO mice

141 Next, we performed LC-MS/MS analysis using the LB fractions isolated from 3-  
142 month-old WT and *Lrrk2* KO mice. Although the ratio of wet lung weight to body weight  
143 was comparable between the genotypes (Figure 2C), total amount of proteins in the LB  
144 fraction was significantly increased in *Lrrk2* KO mice (Figure 2D). The LC-MS/MS  
145 analysis identified approximately 1,500 proteins from the LB fraction, and several  
146 proteins specifically expressed in LBs, including *Sftpb*, *Sftpc*, and *Abca3* were shown to  
147 be highly enriched, indicating that the LB proteome was successfully acquired (Dataset  
148 S1). Label-free quantification demonstrated that 93 proteins were significantly increased  
149 by more than 2-fold, and 74 proteins were decreased by less than 0.5-fold in the *Lrrk2*  
150 KO mouse LB fraction compared with the corresponding fraction from WT mice (Figure  
151 2E).

152

#### 153 Bioinformatic analyses of the differentially expressed proteins

154 To further confirm genotype-dependent changes, z-scores were calculated based on



155 the level of each protein quantified in the LC-MS/MS analysis. Clustering analysis based  
156 on the z-scores of differentially detected proteins separated the genotypes (Figure 2F).  
157 These results suggested that the LB proteome was robustly different between *Lrrk2* KO  
158 mice and WT mice.

159 Gene ontology (GO) enrichment analysis demonstrated that several GO terms,  
160 including “small GTPase mediated signal transduction”, were significantly enriched  
161 among proteins increased in *Lrrk2* KO LBs (Figure S1A). We also noticed that a large  
162 number of Rab GTPases were significantly increased in the *Lrrk2* KO LBs (Dataset S1),  
163 some of which have previously been shown to be physiologically phosphorylated by  
164 LRRK2 (Steger *et al*, 2017). Proteins decreased in *Lrrk2* KO LBs had GO terms including  
165 “negative regulation of peptidase activity”, “anterograde synaptic vesicle transport”,  
166 “lysosome localization”, “blood coagulation hemostasis”, “anterograde axonal transport”,  
167 and “innate immune response” (Figure S1B). Interestingly, subunit proteins of BORC,  
168 including Bloc1s2, Snapin, Borcs5/Loh12cr1, Borcs6/C17orf59, and BORCS7/C10orf32,  
169 and subunits of late endosomal/lysosomal adaptor, MAPK and mTOR activator  
170 (LAMTOR), including Lamtor1, Lamtor4, and Lamtor5, were significantly decreased in  
171 *Lrrk2* KO LBs (Figure 2E, Dataset S1). These results suggested that BORC functions in  
172 regulating the size of LBs downstream of LRRK2.

173 Collectively, based on the results of our proteomic analysis of LBs, we hypothesize  
174 that the increase in Rab GTPases and/or the decrease in BORC on LBs are involved in  
175 the enlargement of LBs in *Lrrk2* KO mice.

176

177 *Altered localization of Rab proteins and BORC subunits on lamellar bodies in Lrrk2 KO*

178 mice

179 To validate the results of the LB proteomics analysis, LB fractions isolated from WT  
180 and *Lrrk2* KO mice were subjected to immunoblotting. The expression levels of Rab3A,  
181 Rab3D, and Rab27A in *Lrrk2* KO mouse LB fractions were significantly increased, which  
182 was consistent with the proteomics results (Figure 3A), whereas no changes were  
183 observed in the lung homogenates (Figure 4A). Borcs5 and Borcs7 were significantly  
184 decreased in the LB fractions of *Lrrk2* KO mice compared with those of WT mice (Figure  
185 3B), whereas they were unchanged in the lung homogenates (Figure 4B). Unfortunately,  
186 we were unable to perform immunoblotting analysis of Borcs6, as all commercially  
187 available antibodies for BORCS6 reacted only with human BORCS6, but not with mouse  
188 Borcs6. We also confirmed the decrease in Lamtor1 and Lamtor4, which are subunit  
189 proteins of the LAMTOR complex, in *Lrrk2* KO LBs compared with WT LBs (Figure  
190 3C), whereas they were unchanged in the lung homogenates (Figure 4C). These results  
191 successfully validated the results of our LB proteomics analysis.

192

193 *A cellular model of lamellar body enlargement*

194 To identify the protein(s) responsible for the enlargement of LBs in the absence of  
195 LRRK2, we first established a cellular model to analyze LB morphology using A549 cells.  
196 As A549 cells were derived from a human lung carcinoma, and harbor multilamellar  
197 organelles, these cells have generally been used as a model of AT2 cells (Mason &  
198 Williams, 1980). Using the clustered regularly interspaced short palindromic repeats  
199 (CRISPR)/Cas9 technology, we generated A549 *LRRK2* KO monoclonal cells (clones  
200 #28, #104, and #126). Genomic sequencing confirmed that all clones have indels in the  
201 respective genes, resulting in a premature stop codon (Figure S2). Immunoblotting

202 analyses confirmed that these established clones lack the endogenous expression of  
203 LRRK2 in contrast to the parental cells (Figure 5A). We also showed that the levels of  
204 phosphorylation of Rab10, which is a physiological substrate of LRRK2, were  
205 significantly decreased in *LRRK2* KO clones (Figure 5A), indicating the lack of LRRK2  
206 kinase activity in these clones. Electron microscopic observation demonstrated that LBs  
207 were enlarged in all *LRRK2* KO A549 clones (Figure 5B). The area occupied by LBs in  
208 the *LRRK2* KO cells was significantly larger than that of the parental cells (Figure 5C).

209 In addition to the genetic model of LB enlargement, we also established a  
210 pharmacological model using A549 cells. A549 cells were treated with two selective  
211 LRRK2 kinase inhibitors with different chemical structures, namely GSK2578215A and  
212 MLi-2, for 1 week. We confirmed that the levels of LRRK2 phosphorylation at Ser935,  
213 which is dephosphorylated upon inhibition of LRRK2 by small compounds, were  
214 significantly decreased in A549 cells upon treatment with the inhibitors (Figure 5D). The  
215 areas occupied by LBs in cells treated with the inhibitors were significantly larger than  
216 that of vehicle-treated cells with dimethylsulfoxide (DMSO) (Figure 5E, F). Taken  
217 together, we successfully established cellular models to evaluate LB enlargement in A549  
218 cells.

219

#### 220 *BORCS6* KO caused lamellar body enlargement in A549 cells

221 To elucidate whether the decrease in the amount of BORC components on LBs  
222 caused the LB enlargement in *Lrrk2* KO mice, we established A549 KO clones lacking  
223 either *BORCS5*, *BORCS6*, or *BORCS7*. Genomic sequencing confirmed that all clones  
224 have indels in the respective genes, resulting in a premature stop codon (Figure S3). We  
225 also confirmed that *BORCS5*, *BORCS6*, and *BORCS7* were not expressed in the

226 corresponding KO clones by immunoblotting (Figure 6A–C). It has been reported that  
227 the KO of BORC components causes the perinuclear accumulation of LAMP1-positive  
228 vesicles (Pu *et al*, 2015). Whereas this phenotype was also observed in our *BORCS5* KO  
229 and *BORCS7* KO A549 clones, *BORCS6* KO A549 cells did not show the perinuclear  
230 accumulation of LAMP1-positive vesicles (Figure 6D). Moreover, the KO of *BORCS5*  
231 caused a reduction in the expression level of *BORCS7* (Figure 6A) and *vice versa* (Figure  
232 6C), whereas *BORCS6* KO did not affect the expression levels of *BORCS5* or *BORCS7*  
233 (Figure 6B), suggesting that *BORCS6* is dispensable for the formation of and function of  
234 BORC in A549 cells.

235 We next analyzed the size of the LBs in these KO cells by electron microscopy, and  
236 found that the *BORCS6* KO clone #9 has enlarged LBs (Figure 6E). Three independent  
237 *BORCS6* KO monoclonal clones (*i.e.*, #9, #11, and #17) demonstrated significantly  
238 enlarged LBs (Figure 7A, B), but *BORCS5* KO and *BORCS7* KO A549 cells did not show  
239 significant changes in the sizes of their LBs (Figure 6E, F). Notably, LBs harboring  
240 multiple cores (*i.e.*, multilamellar bodies) were often observed in *BORCS6* KO cells  
241 (Figure 6E, Figure 7A). The phosphorylation levels of the physiological substrates of  
242 LRRK2, namely, Rab10 and Rab12, were not greatly changed in *BORCS6* KO cells when  
243 analyzed by immunoblotting (Figure 7C). Lentiviral overexpression of V5-tagged  
244 *BORCS6* in A549 *BORCS6* KO cells restored the size of LBs to the level in A549 parental  
245 cells (Figure 7D–F), indicating that the on-target deletion of *BORCS6* caused the  
246 enlargement of LBs in A549 cells. Taken together, these results suggested that *BORCS6*  
247 is involved in the enlargement of LBs caused by the absence of LRRK2.

248

249 Discussion

250 In the present study, we quantitatively analyzed the enlargement of lung LBs in *Lrrk2*  
251 KO mice, and systematically identified proteins differentially expressed in the LBs of  
252 *Lrrk2* KO mice compared with WT mice, by label-free quantitative mass spectrometry  
253 analysis. We found that the LB proteome was substantially different in *Lrrk2* KO mice  
254 compared with WT mice, and that several Rab GTPases and BORC subunits had an  
255 altered localization in *Lrrk2* KO mice. We then established cellular models of LB  
256 enlargement by the KO or inhibition of LRRK2 in A549 cells, and we identified that the  
257 loss of BORCS6 causes LB enlargement. These results suggest that BORCS6 is involved  
258 in the regulation of the size of lung LBs, and its dissociation from LBs is responsible for  
259 the enlargement of LBs in the absence of LRRK2 activity (Figure 8).

260 A previous report has shown that AT2 cells primary cultured from *Lrrk2* KO rats are  
261 deficient in LB exocytosis (Miklavc *et al*, 2014). In fact, in our study, the levels of Sftpc  
262 in BALF were significantly decreased in *Lrrk2* KO mice (Figure 1C), suggesting that the  
263 exocytosis of surfactant proteins from LBs are also impaired in *Lrrk2* KO mice. Eguchi  
264 and colleagues have shown that in macrophages, LRRK2 promotes lysosomal exocytosis  
265 when lysosomes are overloaded with lysosomotropic materials such as chloroquine  
266 (Eguchi *et al*, 2018). In this sense, it is reasonable to suppose that in AT2 cells, LRRK2  
267 is also involved in the exocytosis of LBs. It would be interesting to investigate in the  
268 future whether the LRRK2-BORCS6 pathway also plays a role in the lysosomal stress  
269 response in macrophages.

270 Among the differentially regulated proteins, several Rab GTPases were significantly  
271 increased in the LB fractions of *Lrrk2* KO mice (Figure 2E). These included LRRK2  
272 substrate Rabs, such as Rab3A/D, Rab5A/B/C, Rab8A/B, and Rab10 (Steger *et al*, 2017),

273 as well as non-LRRK2 substrate Rabs, such as Rab1A/B, Rab27A/B, Rab18, Rab6A,  
274 Rab31, Rab21, Rab34, Rab33, Rab22A, Rab7A, Rab14, and Rab38. Some of these Rab  
275 proteins are involved in the biogenesis of LBs; Rab3D, for example, is localized on LBs  
276 at the cell periphery, thereby facilitating their exocytosis (Van Weeren *et al*, 2004).  
277 Furthermore, *Rab38* KO animals often show LB enlargement, implicating the  
278 involvement of Rab38 in the regulation of LB biogenesis (Osanai *et al*, 2010). However,  
279 further investigation is required to unequivocally identify which, if any, Rab(s) play a role  
280 in the enlargement of LBs in *Lrrk2* KO mice.

281 BORG consists of eight proteins, namely, BORCS1 to 8 (Pu *et al*, 2015). BORG  
282 exists on lysosomal membranes and promotes the microtubule-dependent centrifugal  
283 transport of lysosomes (Guardia *et al*, 2016). Considering that the LB is a lysosome-  
284 related organelle and shares some properties with lysosomes, its transport as well as  
285 biogenesis may be regulated by BORG. Interestingly, we found that most of the BORG  
286 subunit proteins were downregulated in *Lrrk2* KO LBs (Figure 3B), whereas no changes  
287 were observed in lung homogenates (Figure 4B). This result prompted us to investigate  
288 whether BORG is involved in the enlargement of LBs. We found that KO of the BORG  
289 component gene *BORCS6* caused enlargement of LBs in A549 cells, similarly to A549  
290 *LRRK2* KO cells (Figure 6). As the LB phenotype observed upon deletion of *BORCS6*  
291 was reproducibly observed in three independent clones, and the phenotype was rescued  
292 by the re-expression of BORCS6 (Figure 7), it was clear that the on-target deletion of  
293 *BORCS6* caused this phenotype. However, KO of the other two BORG subunits, *BORCS5*  
294 and *BORCS7*, did not show similar effects (Figure 6). These results suggest that loss of  
295 BORG itself is not involved in the enlargement of LBs observed in the *BORCS6* KO cells.  
296 It has been shown that in HeLa cells, the downregulation of BORG components, including

297 BORCS6, causes the accumulation of lysosomes in the perinuclear region (Pu *et al*, 2015;  
298 Filipek *et al*, 2017). In contrast, in A549 cells, whereas the KO of *BORCS5* and *BORCS7*  
299 caused the perinuclear accumulation of LAMP1-positive lysosomes, the KO of *BORCS6*  
300 did not (Figure 6D), indicating that BORCS6 is dispensable for BORG function in A549  
301 cells. These results suggest that BORCS6 may act on its own or in complex with other  
302 proteins to maintain the morphology of LBs. It has been shown that BORCS6 (also known  
303 as C17orf59 or Lyspersin) associates with LAMTOR on lysosomes, thereby inhibiting  
304 the recruitment of mammalian target of rapamycin complex 1 (mTORC1) to lysosomes  
305 (Schweitzer *et al*, 2015). As the levels of the subunit proteins of LAMTOR were also  
306 decreased in the *Lrrk2* KO LBs (Figure 3C), BORCS6 together with LAMTOR may play  
307 a role in the regulation of the size of LBs in AT2 cells.

308 In summary, we found that BORCS6 is involved in the maintenance of LBs, which  
309 we propose to be regulated by LRRK2 (Figure 8). Further studies investigating the  
310 molecular mechanism(s) of how LRRK2 regulates the association/dissociation of  
311 BORCS6 to/from LBs, as well as how the LRRK2-BORCS6 pathway regulates LB  
312 exocytosis in AT2 cells will provide clues towards elucidating the physiological functions  
313 of LRRK2.

314

## 315 **Materials and methods**

### 316 Animal experiments

317 All experiments using animals in this study were performed according to the  
318 guidelines provided by the Institutional Animal Care Committee of the Graduate School  
319 of Pharmaceutical Sciences at the University of Tokyo (protocol no. P29-48). All animals  
320 were maintained on a 12 h light/dark cycle with food and water available *ad libitum*.  
321 *Lrrk2* KO mice were kindly provided by Professor Jie Shen (Harvard Medical School).  
322 PCR genotyping of *Lrrk2* KO mice using genomic DNA extracted from mouse tissues  
323 was performed using the following three primers: 5'-  
324 GGCTCTGAAGAAGTTGATAGTCAGGCTG-3', 5'-  
325 GAACTTCTGTCTGCAGCCATCATC-3', and 5'-  
326 CTGTACACTGGCAACTCTCATGTAGGAG-3'.

327

### 328 Quantification of surfactant protein C in BALF

329 BALF was collected from terminally anesthetized mice by instilling and retracting  
330 1 mL of phosphate-buffered saline (PBS) via a catheter inserted into the trachea. The  
331 collected fluid was centrifuged at 500 g for 10 min at 4 °C. The supernatant was used for  
332 ELISA and protein assay. The ELISA reaction was performed according to the  
333 manufacturer's instructions. An Sftpc ELISA kit for the mouse was purchased from Aviva  
334 Systems Biology (OKEH01170). Total protein concentration in BALF was determined  
335 using a Micro Bicinchoninic Acid Protein Assay kit (G-Biosciences; #786-572).

336

### 337 Isolation of lamellar bodies from mouse lungs

338 The lungs perfused with PBS were dissected, transferred to the homogenization



339 buffer (1 M sucrose, 10 mM HEPES-NaOH pH 7.5, Complete protease inhibitor cocktail  
340 (Sigma-Aldrich), 10 times the volume of the lung wet weight) and homogenized using a  
341 Polytron homogenizer (Hitachi) 2 times each for 10 sec on ice. The homogenates were  
342 filtered through a 100 µm cell strainer (Falcon), centrifuged at 1,000 g for 10 min at 4 °C  
343 to remove cell debris and nuclei, and the supernatants were collected. Sucrose gradient  
344 centrifugation was performed using a discontinuous gradient of 0.9 M to 0.2 M sucrose.  
345 The post-nuclear supernatants were ultracentrifuged using SW41Ti rotor at 100,000 g for  
346 3 h at 4 °C on Optima L-90K (Beckman Coulter). The fraction between 0.4–0.5 M sucrose  
347 was collected, and the sucrose concentration was adjusted to 0.24 M using a refractometer.  
348 The samples were then ultracentrifuged one more time at 20,000 g, 15 min at 4 °C to  
349 collect the LBs as pellets. For immunoblotting, the pellets containing LBs were  
350 solubilized in the SDS–PAGE sample buffer, and the protein concentration of the samples  
351 was measured by Micro Bicinchoninic Acid Protein Assay kit (G-Biosciences; #786-572).  
352 2-mercaptoethanol was added to a final concentration of 1% (v/v), and the samples were  
353 heated for 15 min at 37 °C.

354

### 355 *Proteomic analysis on isolated lamellar bodies*

356 LBs were isolated from 3-month-old male mice as described above, and the pellets  
357 were resuspended in 50 µL per mouse of the lysis buffer (50 mM Tris-HCl pH 8.0, 9 M  
358 urea). The suspensions were sonicated 5 times each for 10 sec on ice, and LB lysates were  
359 obtained as supernatants following centrifugation. The lysates were snap-frozen in liquid  
360 nitrogen and subjected to an LC-MS/MS analysis (Medical ProteoScope, Inc., Japan).

361 Ten µL of the supernatants were subjected to SDS-PAGE, and the gel was stained  
362 with SYPRO Ruby Protein Gel Stain (Thermo Fisher Scientific). Fluorescent images

363 were obtained on an image analyzer LAS-3000 (Fujifilm, Japan). The total protein  
364 content of each LB fraction was calculated based on the fluorescence intensity using a  
365 known amount of HeLa cell lysate running side-by-side as a standard.

366 Three hundred  $\mu\text{g}$  of the LB lysates were dried and solubilized in a solution  
367 containing 8 M urea, 50 mM Tris-HCl, pH 8.0. The cysteine residues were reduced with  
368 dithiothreitol at 37 °C for 30 min, followed by alkylation with iodoacetamide. The urea  
369 concentration of the sample was adjusted to 2 M using a buffer containing 50 mM Tris-  
370 HCl pH 8.0, and mass grade trypsin was added to the samples and incubated at 37 °C for  
371 16 h. Digested peptides were desalted using C18 STAGE tips (Rappsilber *et al*, 2003) and  
372 dried under reduced pressure.

373 The dried peptide samples were dissolved in a solvent (water: acetonitrile:  
374 trifluoroacetic acid = 98: 2: 0.1 by volume). The two-thirds of the samples were purified  
375 on a nano HPLC capillary column (particle size: 3  $\mu\text{m}$ ; inner diameter: 75  $\mu\text{m}$ ; length 15  
376 cm) (Nikkyo Technos Co., Ltd., Japan), at a constant flow rate of 350 nL/min, with a  
377 gradient 0% to 40% B in 120 min; solvent A: water/formic acid 100:0.1 (v:v); solvent B:  
378 water/acetonitrile/formic acid 10:90:0.1 (v:v:v). The MS analysis was performed on a Q  
379 Exactive Orbitrap mass spectrometer (Thermo Fisher Scientific) with the top 10  
380 acquisition method: MS resolution 70,000, between 300 and 1500 m/z, followed by  
381 MS/MS (resolution 17,500) on the most intense 10 peaks.

382 Raw MS data were processed using MaxQuant version 1.6.3.3 (Cox & Mann, 2008)  
383 with an FDR < 0.01 at the level of proteins and peptides. Searches were performed against  
384 the Mouse UniProt FASTA database (downloaded in December 2018). Enzyme  
385 specificity was set to trypsin, and the search included cysteine carbamidomethylation as  
386 a fixed modification and N-acetylation of protein and oxidation of methionine as variable

387 modifications. Up to 2 missed cleavages were allowed for protease digestion.  
388 Quantification was performed by MaxQuant with ‘match between runs’ enabled  
389 (matching time window: 0.7 min).

390

#### 391 Bioinformatic analysis on lamellar body proteomes

392 Bioinformatic analysis for creating the volcano plot shown in Figure 2E was  
393 performed on Perseus and data was visualized using Prism (GraphPad Software). The  
394 heatmap shown in Figure 2F created and visualized on R, LFQ intensity values calculated  
395 using MaxQuant were converted to z-scores by the genefilter package. The heatmap.s  
396 function of the gplot package was used to create heatmaps. Gene ontology enrichment  
397 analyses were performed using DAVID (<https://david.ncifcrf.gov>).

398

#### 399 Cell culture

400 A549 cells (purchased from JCRB cell bank, Japan (JCRB0076)) and Lenti-X 293T  
401 cells (Takara Bio, Japan) were cultured in high-glucose Dulbecco’s modified Eagle’s  
402 media (DMEM; Fujifilm Wako, Japan; #044-29765) supplemented with 10% (v/v) fetal  
403 bovine serum (FBS) (Biosera) and 50 units/mL penicillin and 50 µg/mL streptomycin at  
404 37 °C in a 5% CO<sub>2</sub> atmosphere. If necessary, cells were treated with GSK2578215A  
405 (MedChemExpress), MLi-2 (a kind gift from Professor Dario Alessi (University of  
406 Dundee, UK)), or an equal volume of the solvent (dimethyl sulfoxide; DMSO). All cell  
407 lines were routinely tested negative for mycoplasma contamination by PCR.

408

#### 409 cDNA cloning and plasmid construction

410 The cDNA encoding human BORCS6 was cloned from human lung total RNA

411 (Takara Bio, Japan) and inserted into pCR4-TOPO (Invitrogen) by TOPO-TA cloning.  
412 The hBORCS6 sequence was amplified by PCR using the following oligonucleotides as  
413 primers: 5'-CCTCGGTCTCGATTCTACGGGATCCATGGAGTCGTCT-3', and 5'-  
414 GAGCTCTAGGATATCGAATTCTCGAGTCACTTGCACAGGGCCTCCAACACC-3'  
415 and inserted into the pLVSIN vector (Takara Bio, Japan) by HiFi assembly (New England  
416 Biolabs) according to manufacturer's instructions.

417

#### 418 Lentiviral transduction of A549 cells

419 A549 cells were plated on 6-well-plate at  $5 \times 10^5$  cells/well and infected with  
420 lentivirus encoding V5-BORCS6. After 24 h incubation, the medium was replaced with  
421 a fresh medium. 24 h later, the cells were transferred into a 10 cm dish and cultured with  
422 medium containing puromycin at 2  $\mu\text{g}/\text{mL}$ . Polyclonal cells obtained after passaging  
423 several times were used for rescue experiments shown in Figure 7.

424

#### 425 Generation of CRISPR knockout cells

426 A549 cells were seeded in 6-well plates at  $2 \times 10^5$  cells/well and transfected with a  
427 set of plasmids targeting a gene (Table S2) using Lipofectamine LTX (Thermo Fisher  
428 Scientific) according to the manufacturer's instructions. At 48 h after transfection, the  
429 media were replaced with fresh ones containing puromycin at 2  $\mu\text{g}/\text{mL}$ . The media was  
430 replaced again at 24 h selection with puromycin. The media were changed to fresh ones  
431 not containing puromycin at 48 h selection, and the cells were grown to confluence. For  
432 establishing monoclonal cells, the cells after puromycin selection were seeded at a density  
433 of 0.4 cells/well into 96-well plates coated with 0.1% (w/v) gelatin (Fujifilm Wako, Japan;  
434 #190-15805) and cultured in DMEM containing 30% (v/v) FBS. After reaching

435 approximately 80% confluency, individual clones were transferred to 6-well plates and  
436 subjected to immunoblotting. Selected clones lacking the expression of protein-of-interest  
437 were sequenced to confirm the knockout: cells were resuspended in QuickExtract  
438 (Lucigen), incubated at 65 °C for 15 min, vortexed for 15 sec, and incubated at 98 °C for  
439 10 min. Cell lysates were then centrifuged at 24,400 g for 1 min at 20 °C. Supernatants  
440 were collected and PCR was performed using KAPA HiFi HotStart ReadyMix (Roche) to  
441 amplify the targeted genomic region. The primers used were listed in Table S3. PCR  
442 products were inserted into p3×FLAG-CMV-10 vector (Sigma-Aldrich) by HiFi  
443 assembly (New England Biolabs) and transformed into DH5 $\alpha$ . Plasmids were isolated  
444 from 20 clones using a miniprep kit (Nippon Genetics, Japan) and sequenced to confirm  
445 frameshift mutations.

446

#### 447 Immunoblotting

448 Immunoblotting was performed as described previously (Ito & Tomita, 2017).  
449 Antibodies used for immunoblotting were listed in Table S1.

450

#### 451 Immunocytochemical experiments

452 Cells were cultured on glass coverslips. The cells were washed with DPBS and fixed  
453 with 4% (w/v) paraformaldehyde/PBS for 15 min at room temperature. The fixed cells  
454 were washed with PBS 3 times and permeabilized in 0.1% (v/v) Triton-X 100/PBS for 30  
455 min at room temperature. The permeabilized cells were blocked in 1% (w/v) bovine  
456 serum albumin/PBS for 1 h at room temperature and incubated with the primary  
457 antibodies diluted in the blocking buffer overnight at 4°C. After washing with PBS,  
458 secondary antibodies labeled with fluorescent dyes were then applied for 1 h at room

459 temperature. The samples were then extensively washed with PBS and mounted using  
460 ProLong Diamond (Thermo Fisher Scientific). Images were taken on a confocal  
461 microscope (SP5, Leica). Image contrast and brightness were adjusted using ImageJ.  
462 Antibodies used for immunoblotting were listed in Table S1.

463

#### 464 Transmission electron microscopy (TEM)

465 After perfusion of the lung with DPBS, a catheter was inserted into the trachea to  
466 wash inside the lung and apply a fixative solution (2% paraformaldehyde, 2.5%  
467 glutaraldehyde in phosphate buffer). The lung was removed and incubated in the fixative  
468 solution at room temperature with gentle agitation. After 24 h fixation, the lung was  
469 chopped into 1-mm<sup>3</sup> blocks and processed as described below.

470 A549 cells were seeded in 6-well plates at  $6 \times 10^5$  cells/well. After 24 h, the cells  
471 were washed with DPBS, detached with trypsin/EDTA, and collected into 1.5 mL tubes.  
472 Cells were centrifuged at 1,500 g for 5 min at 4 °C and the supernatants were discarded.  
473 The cell pellets were washed with DPBS, resuspended in 1 mL of the fixative solution,  
474 and incubated for 1 h at room temperature. The cells were then pelleted and washed 3  
475 times with PBS. Five hundred microliters of 4% (w/v) low-melting temperature agarose  
476 (Sigma-Aldrich) diluted in double deionized water (DDW) were added to the tubes  
477 without collapsing the pellet, and the samples were left to stand at room temperature for  
478 10 min and then on ice for 20 min to harden the agarose. The pellets embedded in agarose  
479 were chopped into 1-mm<sup>3</sup> blocks on ice and immersed in 0.1 M cacodylate-HCl pH 7.4  
480 for 5 min at room temperature. Immersion of the blocks in the cacodylate buffer was  
481 repeated 3 times. The blocks were post-fixed with 1% (w/v) OsO<sub>4</sub> (Nisshin EM, Japan),  
482 1.5% (w/v) potassium ferrocyanide in 0.1 M cacodylate-HCl (pH 7.4) for 1 h on ice. The

483 blocks were then washed with DDW 2 times for 10 min and incubated in 1% (w/v) uranyl  
484 acetate (Merck)/70% (v/v) ethanol for 40 min at room temperature in the dark. The blocks  
485 were rinsed with 70% ethanol and washed with 80%, 90%, 95%, 99% (once for each),  
486 and 100% ethanol for 2 times at room temperature each for 10 min. The blocks were  
487 dehydrated twice with QY-1 (Nisshin EM) for 10 min at room temperature, put in the 1:1  
488 mixture of Durcupan (Sigma-Aldrich) and QY-1, and rotated overnight at room  
489 temperature. On the next day, the samples were transferred to Durcupan and rotated for 2  
490 h at room temperature. This process was repeated 2 more times. Fresh Durcupan was  
491 poured into molds, where the samples were immersed, and the samples were hardened at  
492 60 °C for 48 h. Seventy nanometers-thick ultrathin sections were prepared with an  
493 ultramicrotome, picked up onto a mesh (Okenshoji, Japan) covered with Formvar, stained  
494 with 4% (w/v) uranyl acetate for 5 min in the dark under a humid condition. After an  
495 extensive wash with DDW, the sections were treated with Reynolds solution in the  
496 presence of KOH (solid) for 2min. The sections were extensively washed with DDW and  
497 imaged under TEM (JEOL-1200EX; JEOL, Japan). Quantification of the area of LBs was  
498 performed on ImageJ with the person quantifying kept blind to the sample identity.

499

#### 500 Statistical analysis

501 Statistical significance of the difference between two samples and among multiple  
502 samples was calculated by the Student's t-test and Tukey-Kramer's test, respectively, on  
503 R. As to the area of LBs, differences of the probability distribution between multiple  
504 samples were examined by the Kolmogorov-Smirnov test on R.

505

506 **Acknowledgements**

507 We are grateful to Drs. Dario Alessi (University of Dundee, UK) and Jie Shen  
508 (Harvard Medical School, USA) for providing MLi-2 and *Lrrk2* knockout mice,  
509 respectively. We thank our current and past laboratory members for helpful discussions.  
510 Social Cooperation Program of Brain and Neurological Disorders at the Graduate School  
511 of Pharmaceutical Sciences, The University of Tokyo is supported by Biogen. This work  
512 was supported in part by Biogen; the Grants-in-Aid for Scientific Research (A) [grant  
513 number 15H02492/ 19H01015 (to T.T.)]; the Grants-in-Aid for Scientific Research (C)  
514 [grant number 17K08265 (to G.I.)]; the Challenging Exploratory Research [grant number  
515 16K15229 (to T.T.)] from the Japan Society for the Promotion of Science; GSK Japan  
516 Research Grant 2017 (to G.I.); and the Mitsubishi Foundation (to T.T.).

517

518 **Author contributions**

519 MA planned and performed experiments and analyses in all figures, discussed results,  
520 and wrote the manuscript. ST was instrumental in experiments involving electron  
521 microscopy, and discussed results. GI and TT planned experiments, discussed results, and  
522 wrote the manuscript. All authors revised the manuscript.

523

524 **Conflict of interest**

525 The authors declare that they have no conflict of interest.

526



527 **References**

- 528 Andersen MA, Wegener KM, Larsen S, Badolo L, Smith GP, Jeggo R, Jensen PH, Sotty  
529 F, Christensen KV & Thougard A (2018) PFE-360-induced LRRK2 inhibition  
530 induces reversible, non-adverse renal changes in rats. *Toxicology* 395: 15–22
- 531 Araki M, Ito G & Tomita T (2018) Physiological and pathological functions of LRRK2:  
532 implications from substrate proteins. *Neuronal Signal* 2: NS20180005
- 533 Civiero L, Vancraenenbroeck R, Belluzzi E, Beilina A, Lobbestael E, Reyniers L, Gao  
534 F, Micetic I, De Maeyer M, Bubacco L, *et al* (2012) Biochemical characterization  
535 of highly purified leucine-rich repeat kinases 1 and 2 demonstrates formation of  
536 homodimers. *PLoS One* 7: e43472
- 537 Cox J & Mann M (2008) MaxQuant enables high peptide identification rates,  
538 individualized p.p.b.-range mass accuracies and proteome-wide protein  
539 quantification. *Nat Biotechnol* 26: 1367–72
- 540 Eguchi T, Kuwahara T, Sakurai M, Komori T, Fujimoto T, Ito G, Yoshimura S, Harada  
541 A, Fukuda M, Koike M, *et al* (2018) LRRK2 and its substrate Rab GTPases are  
542 sequentially targeted onto stressed lysosomes and maintain their homeostasis. *Proc*  
543 *Natl Acad Sci* 115: E9115–E9124
- 544 Encarnação M, Espada L, Escrevente C, Mateus D, Ramalho J, Michelet X, Santarino I,  
545 Hsu VW, Brenner MB, Barral DC, *et al* (2016) A Rab3a-dependent complex  
546 essential for lysosome positioning and plasma membrane repair. *J Cell Biol* 213:  
547 631–640
- 548 Filipek PA, de Araujo MEG, Vogel GF, De Smet CH, Eberharter D, Rebsamen M,  
549 Rudashevskaya EL, Kremser L, Yordanov T, Tschalkner P, *et al* (2017)  
550 LAMTOR/Ragulator is a negative regulator of Arl8b- and BORC-dependent late

551 endosomal positioning. *J Cell Biol* 216: 4199–4215

552 Fuji RN, Flagella M, Baca M, Baptista MAS, Brodbeck J, Chan BK, Fiske BK,  
553 Honigberg L, Jubb AM, Katavolos P, *et al* (2015) Effect of selective LRRK2  
554 kinase inhibition on nonhuman primate lung. *Sci Transl Med* 7: 1–13

555 Giasson BI, Covy JP, Bonini NM, Hurtig HI, Farrer MJ, Trojanowski JQ & Van Deerlin  
556 VM (2006) Biochemical and pathological characterization of Lrrk2. *Ann Neurol*  
557 59: 315–22

558 Guardia CM, Farías GG, Jia R, Pu J & Bonifacino JS (2016) BORC Functions  
559 Upstream of Kinesins 1 and 3 to Coordinate Regional Movement of Lysosomes  
560 along Different Microtubule Tracks. *Cell Rep* 17: 1950–1961

561 Harney J, Bajaj P, Finley JE, Kopec AK, Koza-Taylor PH, Boucher GG, Lanz TA,  
562 Doshna CM, Somps CJ, Adkins K, *et al* (2020) An in vitro alveolar epithelial cell  
563 model recapitulates LRRK2 inhibitor-induced increases in lamellar body size  
564 observed in preclinical models. *Toxicol Vitro*: 105012

565 Herzig MC, Kolly C, Persohn E, Theil D, Schweizer T, Hafner T, Stemmelen C,  
566 Troxler TJ, Schmid P, Danner S, *et al* (2011) LRRK2 protein levels are determined  
567 by kinase function and are crucial for kidney and lung homeostasis in mice. *Hum*  
568 *Mol Genet* 20: 4209–23

569 Hook GER & Gilmore LB (1982) Hydrolases of pulmonary lysosomes and lamellar  
570 bodies. *J Biol Chem* 257: 9211–9220

571 Ito G, Katsemonova K, Tonelli F, Lis P, Baptista M, Shpiro N, Duddy G, Wilson S, Ho  
572 W-L, Ho S-L, *et al* (2016) Phos-tag analysis of Rab10 phosphorylation by LRRK2:  
573 a powerful assay for assessing kinase function and inhibitors. *Biochem J* 473:  
574 2671–2685

- 575 Ito G & Tomita T (2017) Rab10 Phosphorylation Detection by LRRK2 Activity Using  
576 SDS-PAGE with a Phosphate-binding Tag. *J Vis Exp*: 1–9
- 577 Mason RJ & Williams MC (1980) Phospholipid composition and ultrastructure of A549  
578 cells and other cultured pulmonary epithelial cells of presumed type II cell origin.  
579 *Biochim Biophys Acta (BBA)/Lipids Lipid Metab* 617: 36–50
- 580 Miklavc P, Ehinger K & Thompson K (2014) Surfactant Secretion in LRRK2 Knock-  
581 Out Rats: Changes in Lamellar Body Morphology and Rate of Exocytosis. *PLoS*  
582 *One* 9
- 583 Mills RD, Mulhern TD, Cheng H-C & Culvenor JG (2012) Analysis of LRRK2  
584 accessory repeat domains: prediction of repeat length, number and sites of  
585 Parkinson’s disease mutations. *Biochem Soc Trans* 40: 1086–9
- 586 Osanai K, Higuchi J, Oikawa R, Kobayashi M, Tsuchihara K, Iguchi M, Huang J,  
587 Voelker DR & Toga H (2010) Altered lung surfactant system in a Rab38-deficient  
588 rat model of Hermansky-Pudlak syndrome. *Am J Physiol Cell Mol Physiol* 298:  
589 L243–L251
- 590 Paisán-Ruíz C, Jain S, Evans EW, Gilks WP, Simón J, van der Brug M, López de  
591 Munain A, Aparicio S, Gil AM, Khan N, *et al* (2004) Cloning of the gene  
592 containing mutations that cause PARK8-linked Parkinson’s disease. *Neuron* 44:  
593 595–600
- 594 Pu J, Schindler C, Jia R, Jarnik M, Backlund P & Bonifacino JS (2015) BORC, a  
595 Multisubunit Complex that Regulates Lysosome Positioning. *Dev Cell* 33: 176–  
596 188
- 597 Rappsilber J, Ishihama Y & Mann M (2003) Stop And Go Extraction tips for matrix-  
598 assisted laser desorption/ionization, nanoelectrospray, and LC/MS sample

- 599 pretreatment in proteomics. *Anal Chem* 75: 663–670
- 600 Ridsdale R, Na C-L, Xu Y, Greis KD & Weaver TE (2011) Comparative Proteomic  
601 Analysis of Lung Lamellar Bodies and Lysosome-Related Organelles. *PLoS One*  
602 6: e16482
- 603 Satake W, Nakabayashi Y, Mizuta I, Hirota Y, Ito C, Kubo M, Kawaguchi T, Tsunoda  
604 T, Watanabe M, Takeda A, *et al* (2009) Genome-wide association study identifies  
605 common variants at four loci as genetic risk factors for Parkinson’s disease. *Nat*  
606 *Genet* 41: 1303–1307
- 607 Schweitzer LD, Comb WC, Bar-Peled L & Sabatini DM (2015) Disruption of the Rag-  
608 Ragulator Complex by c17orf59 Inhibits mTORC1. *Cell Rep* 12: 1445–1455
- 609 Simón-Sánchez J, Schulte C, Bras JM, Sharma M, Gibbs JR, Berg D, Paisán-Ruíz C,  
610 Lichtner P, Scholz SW, Hernandez DG, *et al* (2009) Genome-wide association  
611 study reveals genetic risk underlying Parkinson’s disease. *Nat Genet* 41: 1308–  
612 1312
- 613 Steger M, Diez F, Dhekne HS, Lis P, Nirujogi RS, Karayel O, Tonelli F, Martinez TN,  
614 Lorentzen E, Pfeffer SR, *et al* (2017) Systematic proteomic analysis of LRRK2-  
615 mediated Rab GTPase phosphorylation establishes a connection to ciliogenesis.  
616 *Elife* 6
- 617 Steger M, Tonelli F, Ito G, Davies P, Trost M, Vetter M, Wachter S, Lorentzen E,  
618 Duddy G, Wilson S, *et al* (2016) Phosphoproteomics reveals that Parkinson’s  
619 disease kinase LRRK2 regulates a subset of Rab GTPases. *Elife* 5: e12813
- 620 Sveinbjornsdottir S (2016) The clinical symptoms of Parkinson’s disease. *J Neurochem*  
621 139: 318–324 doi:10.1111/jnc.13691 [PREPRINT]
- 622 Vancraenenbroeck R, Lobbstaël E, Weeks SD, Strelkov S V, Baekelandt V, Taymans

- 623 J-M & De Maeyer M (2012) Expression, purification and preliminary biochemical  
624 and structural characterization of the leucine rich repeat namesake domain of  
625 leucine rich repeat kinase 2. *Biochim Biophys Acta* 1824: 450–60
- 626 Wadsworth SJ, Spitzer AR & Chander A (1997) Ionic regulation of proton chemical  
627 (pH) and electrical gradients in lung lamellar bodies. *Am J Physiol - Lung Cell Mol*  
628 *Physiol* 273
- 629 Weaver TE, Na C-L & Stahlman M (2002) Biogenesis of lamellar bodies, lysosome-  
630 related organelles involved in storage and secretion of pulmonary surfactant. *Semin*  
631 *Cell Dev Biol* 13: 263–270
- 632 Van Weeren L, De Graaff AM, Jamieson JD, Batenburg JJ & Valentijn JA (2004)  
633 Rab3D and Actin Reveal Distinct Lamellar Body Subpopulations in Alveolar  
634 Epithelial Type II Cells. *Am J Respir Cell Mol Biol* 30: 288–295
- 635 Yu M, Arshad M, Wang W, Zhao D, Xu L & Zhou L (2018) LRRK2 mediated Rab8a  
636 phosphorylation promotes lipid storage. *Lipids Health Dis* 17: 34
- 637 Zimprich A, Biskup S, Leitner P, Lichtner P, Farrer MJ, Lincoln S, Kachergus J,  
638 Hulihan M, Uitti RJ, Calne DB, *et al* (2004) Mutations in LRRK2 cause  
639 autosomal-dominant parkinsonism with pleomorphic pathology. *Neuron* 44: 601–  
640 607
- 641
- 642

643 **Figure legends**

644 Figure 1. *Lrrk2* knockout mice exhibited enlarged lamellar bodies in the lung.

645 A) Representative images of LBs (asterisks in the bottom panels) in WT, *Lrrk2* +/-  
646 (HET), and *Lrrk2* KO mouse lungs (male, 2 months old) observed by TEM. Regions  
647 marked with white dotted lines in the top panels were magnified in the bottom panels.  
648 Scale bars: 500 nm (top/bottom panels).

649 B) The areas of LBs in the TEM images were manually measured on ImageJ and their  
650 probability distributions were presented as violin plots. The circles in the plot  
651 represent the medians of the values. The total numbers of LBs examined were 382  
652 (WT), 431 (*Lrrk2* HET) and 442 (*Lrrk2* KO). \*\*\* $p < 0.001$  (Kolmogorov-Smirnov  
653 test).

654 C) The concentrations of Sftpc in BALF collected from WT and *Lrrk2* KO mice were  
655 measured by ELISA (n=6, male, 3 months old for both genotypes). The values were  
656 normalized by the amount of total proteins in the BALF. The circles in the graph  
657 represent individual values. The bars and the error bars in the graph represent the  
658 mean values and the standard errors, respectively. \*\* $p < 0.01$  (Student's t-test).

659

660 Figure 2. Lamellar body proteome was substantially changed in *Lrrk2* KO mice.

661 A) A schematic depiction of LB isolation from a mouse lung by sucrose gradient  
662 centrifugation.

663 B) Fractions obtained by the sucrose gradient centrifugation (fractions 1–11 collected  
664 from the bottom), as well as the supernatant (S) and pellet (P) fractions after the  
665 second centrifugation was analyzed by immunoblotting with indicated antibodies.  
666 Abca3, Atp8a1, and Lamp1 are proteins existing in LBs, whereas Rab5 and Rcas1

- 667 are markers for endosomes and Golgi apparatus, respectively.
- 668 C) The percentage of the lung wet weight to the bodyweight of WT and *Lrrk2* KO mice  
669 (n=4, male, 3 months old for both genotypes). The dots in the graph represent  
670 individual values. The bars and the error bars in the graph represent the mean values  
671 and the standard errors, respectively. “n.s.” means “not significant” (Student’s t-test).
- 672 D) The amount of LB proteins measured on an SDS-PAGE gel stained with SYPRO  
673 Ruby. The dots in the graph represent individual values. The bars and the error bars  
674 in the graph represent the mean values and the standard errors, respectively.  
675 \*\*\*p<0.001 (Student’s t-test).
- 676 E) A volcano plot of the 1,519 proteins quantified in the LC-MS/MS analysis of the LB  
677 fractions. Each circle represents a protein. Significantly increased proteins in the  
678 *Lrrk2* KO LBs were marked in red, whereas significantly decreased proteins were  
679 marked in blue. The proteins picked up in Fig. 3 were marked in yellow circles. The  
680 LB proteins analyzed in Fig. 2B were marked in yellow diamonds.
- 681 F) A heat map of the quantitative values of the LRRK2-regulated proteins. The  
682 genotypes (WT1–3 and KO1–3) were shown at the bottom of the heat map. The z-  
683 scores were color-coded from -2 (blue) to 2 (red).

684

685 Figure 3. Immunoblot of the regulated proteins in lamellar body fractions

- 686 A–C) Expression levels of the indicated proteins in LB fractions were analyzed by  
687 immunoblotting (left panel). Lamp1 was used as a loading control. Three-month-old  
688 male mice were used for both genotypes. The dots in the graph represent individual  
689 values. The bars and the error bars in the graph represent the mean values and the  
690 standard errors, respectively. \*\*\*p<0.001 (Student’s t-test). The numbers of mice

691 examined were 4 WT and 4 *Lrrk2* KO in (A), 4 WT and 5 *Lrrk2* KO in (B), and 6  
692 WT and 6 *Lrrk2* KO in (C).

693

694 Figure 4. Immunoblot of the regulated proteins in lung homogenates

695 A–C) Expression levels of the indicated proteins in lung homogenates were analyzed by  
696 immunoblotting (left panel).  $\alpha$ -tubulin was used as a loading control. Lung  
697 homogenates were prepared from the identical sets of mice described in Figure 3.  
698 The dots in the graph represent individual values. The bars and the error bars in the  
699 graph represent the mean values and the standard errors, respectively. “n.s.” means  
700 “not significant” (Student’s t-test). The numbers of mice examined were 4 WT and 4  
701 *Lrrk2* KO in (A), 4 WT and 5 *Lrrk2* KO in (B), and 6 WT and 6 *Lrrk2* KO in (C).

702

703 Figure 5. LRRK2 KO caused lamellar body enlargement in A549 cells.

704 A) Expression levels of endogenous total LRRK2, phospho-Ser935 LRRK2,  
705 endogenous total Rab10, and phospho-Thr73 Rab10 in A549 parental (WT) as well  
706 as in *LRRK2* KO clones (#28, #104, and #126) were examined by immunoblotting.  
707  $\alpha$ -tubulin was used as a loading control. Cells were treated with 0.1% DMSO (–) or  
708 10 nM MLi-2 (+) for 24 h prior to lysis.

709 B) Representative images of LBs (asterisks in the bottom panels) in A549 WT as well  
710 as *LRRK2* KO cells observed by TEM at low magnification (top panels; scale bars: 1  
711  $\mu$ m) and high magnification (bottom panels; scale bars: 500 nm). Regions marked  
712 with white dotted lines in the top panels were magnified in the bottom panels.

713 C) The areas of LBs in the TEM images were manually measured on ImageJ and their  
714 probability distributions were presented as violin plots. The circles in the plot



715 represent the medians of the values. The total numbers of LBs examined were 400  
716 (WT), 398 (#28), 380 (#104), and 401 (#126). \*\*\* $p < 0.001$  (Kolmogorov-Smirnov  
717 test).

718 D) Expression levels of endogenous total LRRK2 and phospho-Ser935 LRRK2 in A549  
719 WT cells treated with 0.1% DMSO, 1  $\mu$ M GSK2578215A (GSK), or 10 nM MLi-2  
720 for 1 week were examined by immunoblotting.  $\alpha$ -tubulin was used as a loading  
721 control.

722 E) Representative images of LBs (asterisks in the bottom panels) in A549 cells treated  
723 with DMSO, GSK2578215A, or MLi-2 observed by TEM at low magnification (top  
724 panels; scale bars: 1  $\mu$ m) and high magnification (bottom panels; scale bars: 500 nm).  
725 Regions marked with white dotted lines in the top panels were magnified in the  
726 bottom panels.

727 F) The areas of LBs in the TEM images were manually measured on ImageJ and their  
728 probability distributions were presented as violin plots. The circles in the plot  
729 represent the medians of the values. The total numbers of LBs examined were 387  
730 (DMSO), 443 (GSK2578215A), and 470 (MLi-2). \*\*\* $p < 0.001$  (Kolmogorov-  
731 Smirnov test).

732

733 Figure 6. Characterization of A549 cells lacking BORCS5/6/7

734 A–C) Expression levels of endogenous BORCS5/6/7 and LRRK2 in A549 parental (WT)  
735 as well as in (A) *BORCS5* KO clones (#10, #13, #20), (B) *BORCS6* KO clones (#9,  
736 #11, #17), or *BORCS7* KO clones (#36, #39, #42) were examined by  
737 immunoblotting.  $\alpha$ -tubulin was used as a loading control.

738 D) Merged immunocytochemical images of A549 WT, *BORCS5* KO (#13), *BORCS6*

739 KO (#9), *BORCS7* KO (#42) cells stained with an anti-LAMP1 antibody (gray).

740 Nuclei were stained with DAPI (blue). Scale bars: 10  $\mu$ m.

741 E) Representative images of LBs (asterisks in the bottom panels) in A549 WT, *BORCS5*

742 KO (#13), *BORCS6* KO (#9), *BORCS7* KO (#42) cells observed by TEM at low

743 magnification (top panels; scale bars: 1  $\mu$ m) and high magnification (bottom panels;

744 scale bars: 500 nm). Regions marked with white dotted lines in the top panels were

745 magnified in the bottom panels.

746 F) The areas of LBs in the TEM images were manually measured on ImageJ and their

747 probability distributions were presented as violin plots. The circles in the plot

748 represent the medians of the values. The total numbers of LBs examined were 426

749 (WT), 380 (*BORCS5* KO #13), 400 (*BORCS6* KO #9), and 406 (*BORCS7* KO #42).

750 \*\*\* $p < 0.001$  (Kolmogorov-Smirnov test).

751

752 Figure 7. *BORCS6* KO caused lamellar body enlargement in A549 cells.

753 A) Representative images of LBs (asterisks in the bottom panels) in A549 WT as well

754 as *BORCS6* KO cells (clones #9, #11, and #17) observed by TEM at low

755 magnification (top panels; scale bars: 1  $\mu$ m) and high magnification (bottom panels;

756 scale bars: 500 nm). Regions marked with white dotted lines in the top panels were

757 magnified in the bottom panels.

758 B) The areas of LBs in the TEM images were manually measured on ImageJ and their

759 probability distributions were presented as violin plots. The circles in the plot

760 represent the medians of the values. The total numbers of LBs examined were 426

761 (WT), 400 (#9), 406 (#11), and 417 (#17). \*\*\* $p < 0.001$  (Kolmogorov-Smirnov test).

762 C) Expression levels of endogenous total Rab10, phospho-Thr73 Rab10, total Rab12,

763 and phospho-Ser106 Rab12 were examined by immunoblotting. The same sets of  
764 samples used in Figure 6B were used.

765 D) Expression levels of BORCS6 in A549 parental (WT) cells, *BORCS6* KO#11 cells,  
766 as well as *BORCS6* KO#11 cells stably expressing V5-BORCS6 were examined by  
767 immunoblotting. Note that longer exposure was required to detect exogenously  
768 expressed V5-BORCS6 (arrow) by an anti-BORCS6 antibody, where the band  
769 corresponding to endogenous BORCS6 (arrowhead) in WT cells became saturated  
770 (the second panel from the top).  $\alpha$ -tubulin was used as a loading control.

771 E) Representative images of LBs (asterisks in the bottom panels) in A549 parental (WT)  
772 cells, *BORCS6* KO#11 cells, as well as V5-BORCS6 cells observed by TEM at low  
773 magnification (top panels; scale bars: 1  $\mu$ m) and high magnification (bottom panels;  
774 scale bars: 500 nm). Regions marked with white dotted lines in the top panels were  
775 magnified in the bottom panels.

776 F) The areas of LBs in the TEM images were manually measured on ImageJ and their  
777 probability distributions were presented as violin plots. The circles in the plot  
778 represent the medians of the values. The total numbers of LBs examined were 428  
779 (WT), 432 (#11), and 421 (#rescue). \*\*\* $p < 0.001$  (Kolmogorov-Smirnov test).

780

781 Figure 8. A hypothetical scheme illustrating how *LRRK2* deficiency causes lamellar body  
782 enlargement through dissociation of *BORCS6*.

783

784

785

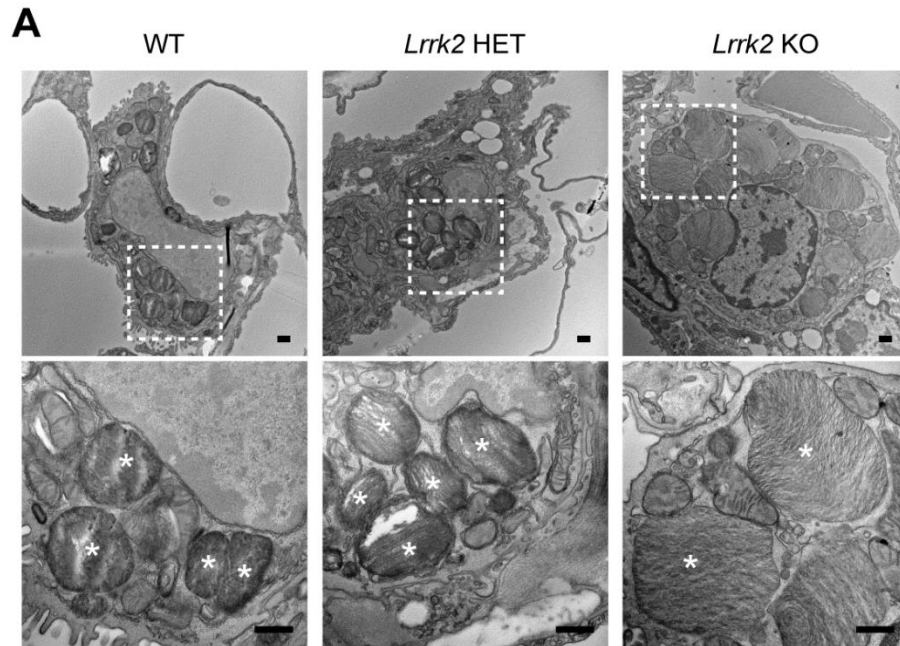

794

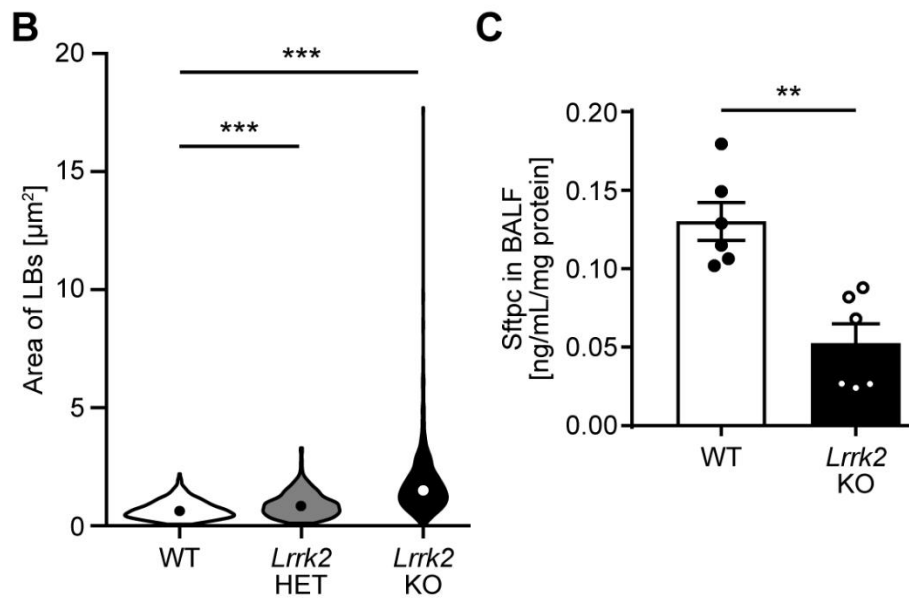

Figure 1

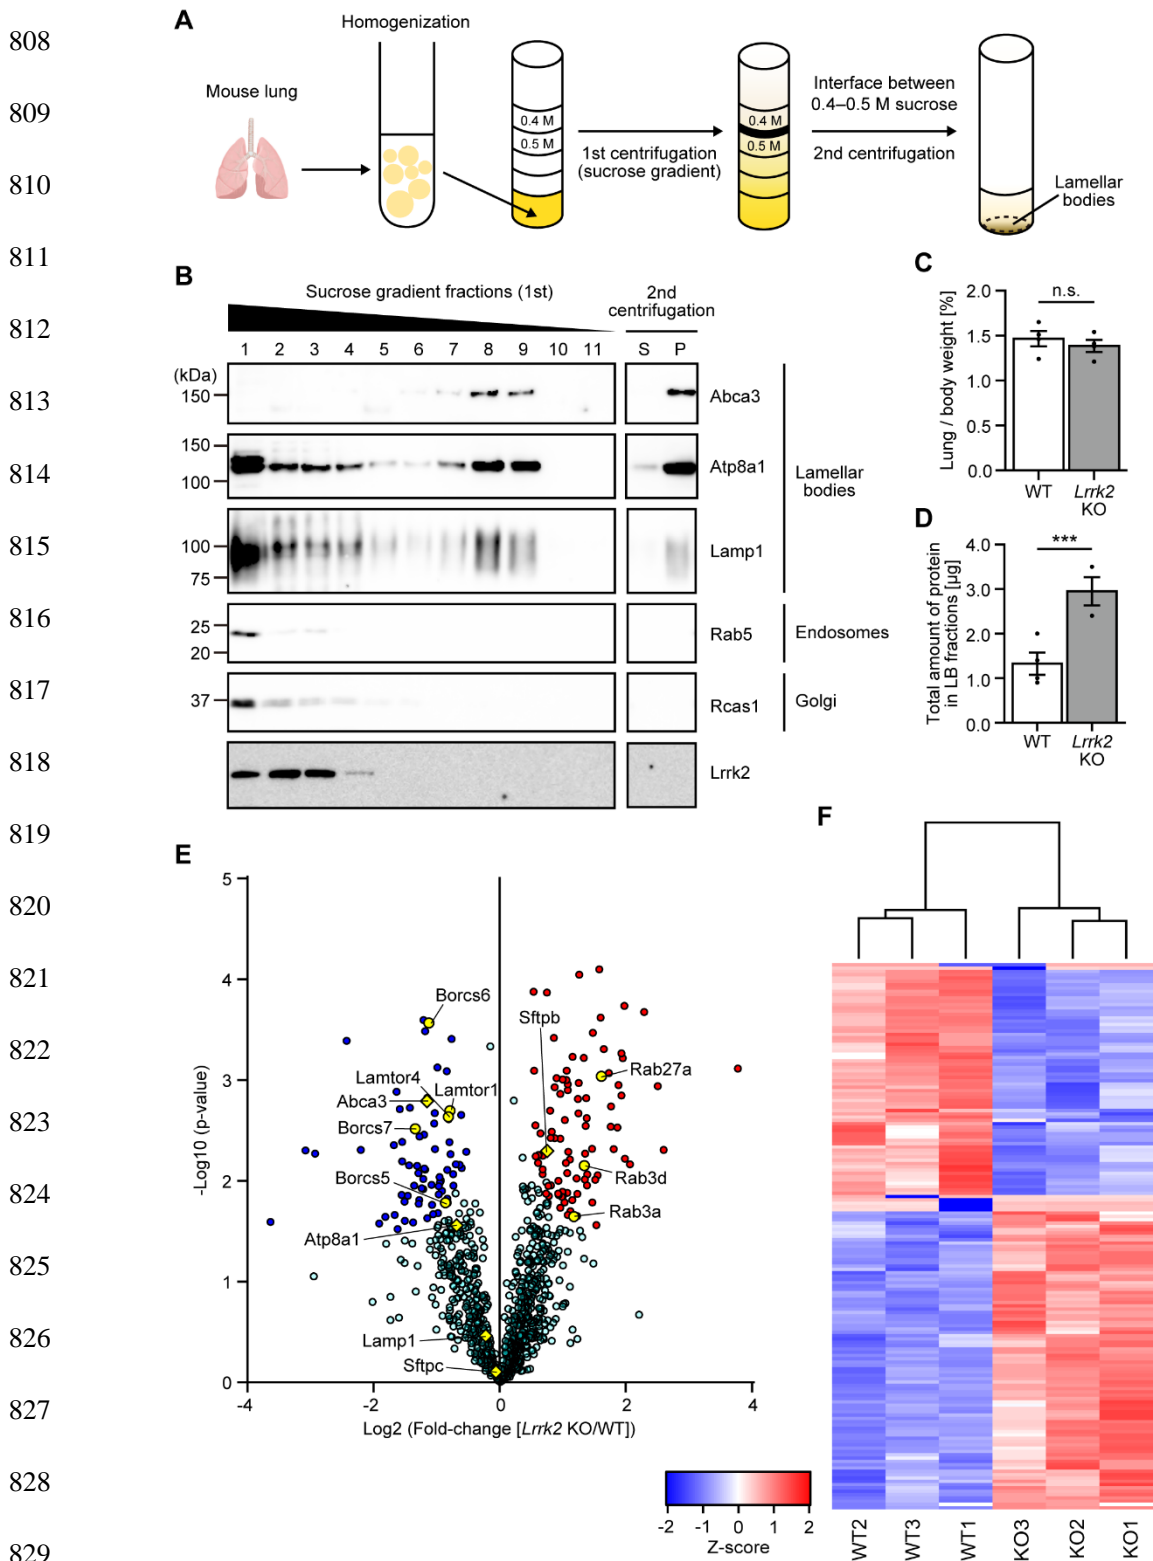

Figure 2

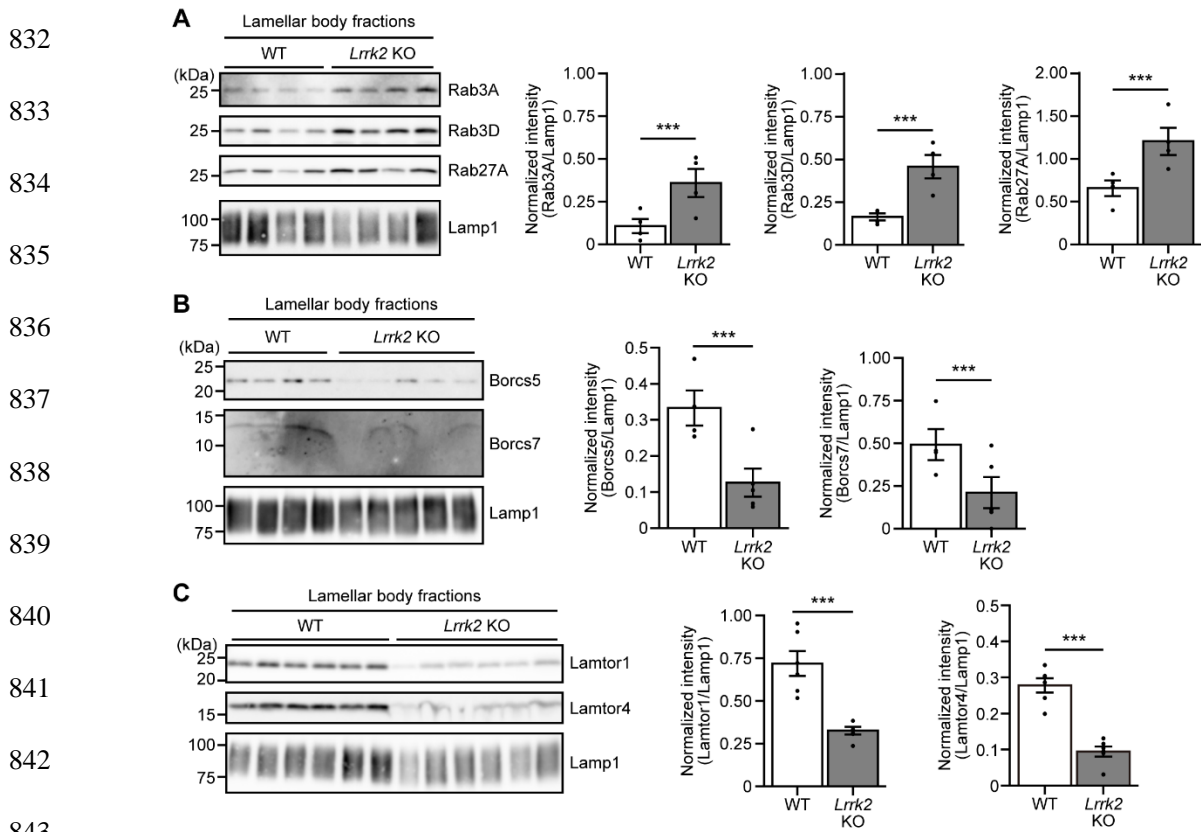

843

844

845 Figure 3

846

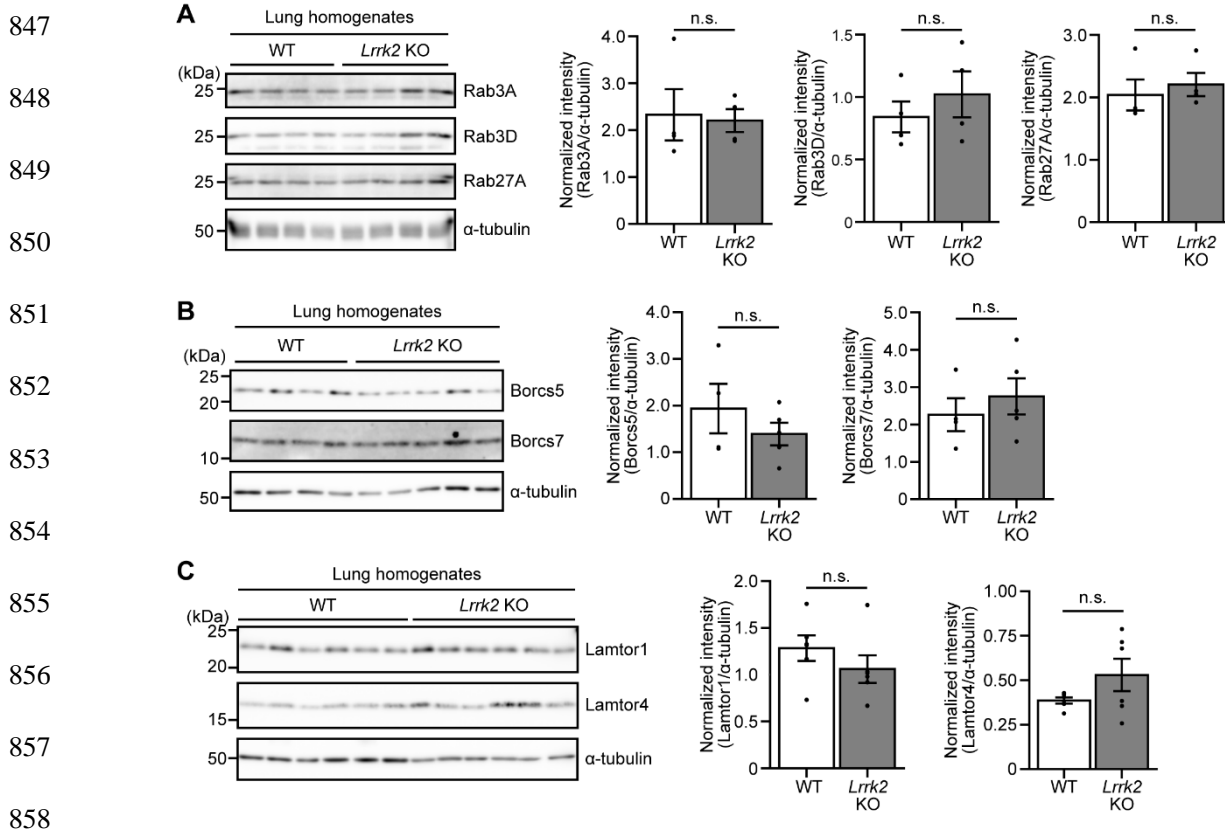

Figure 4

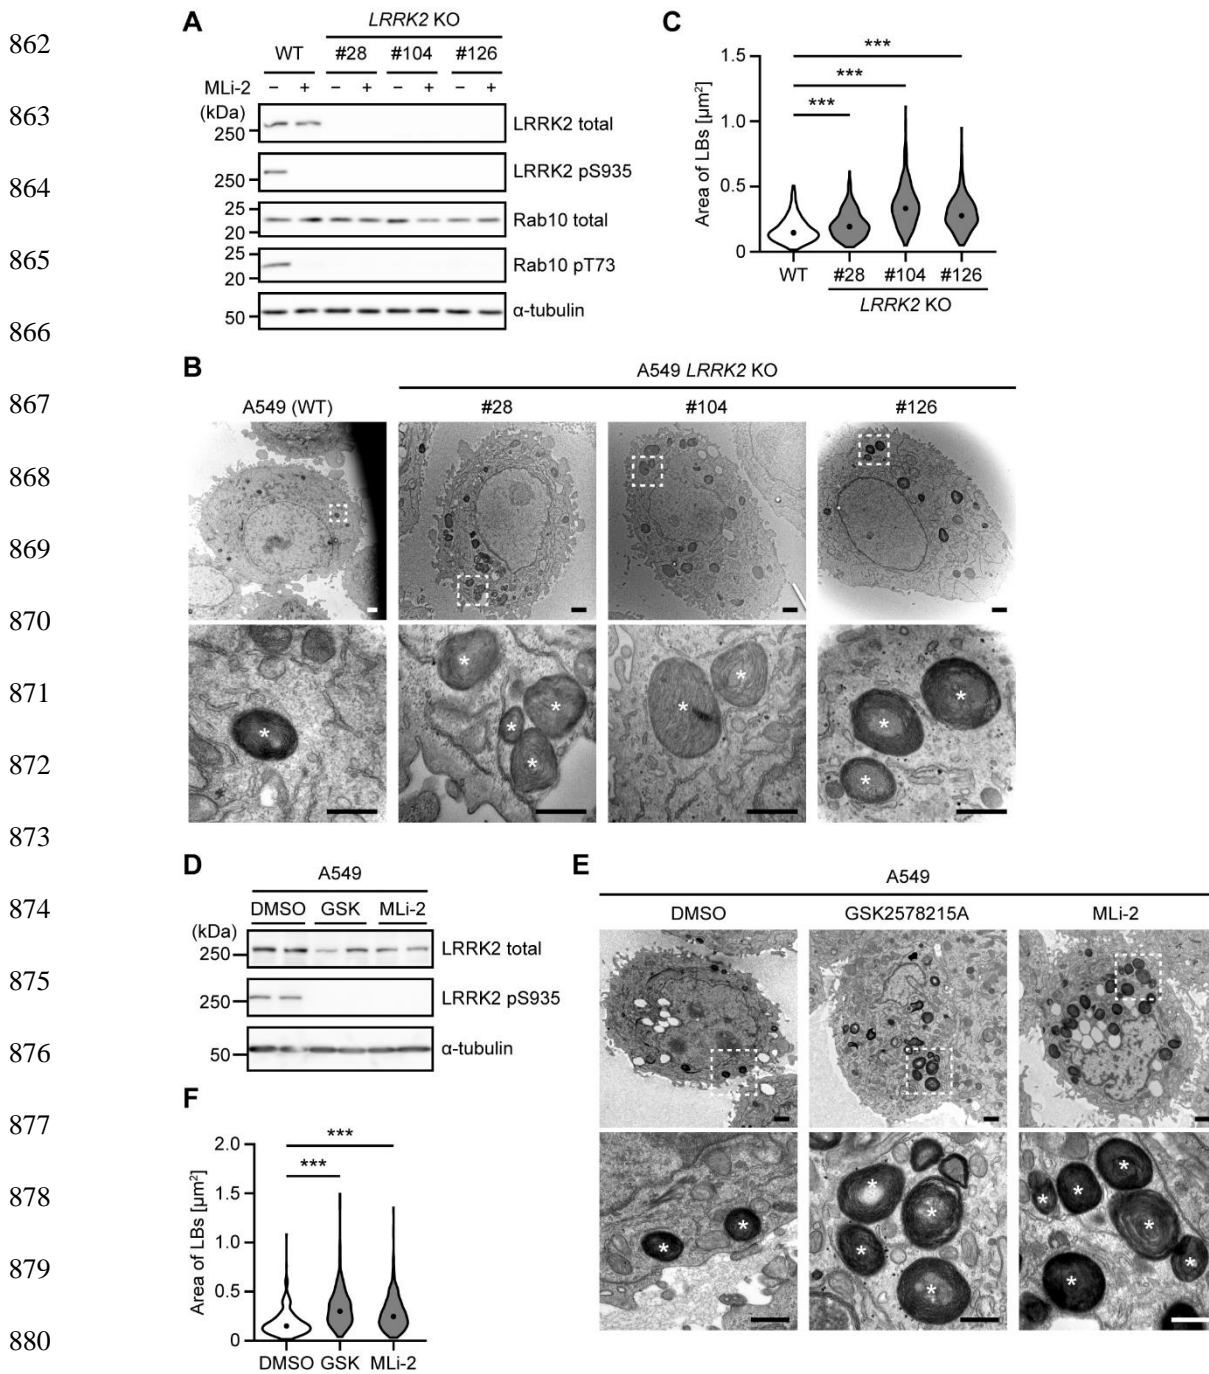

883 Figure 5

884



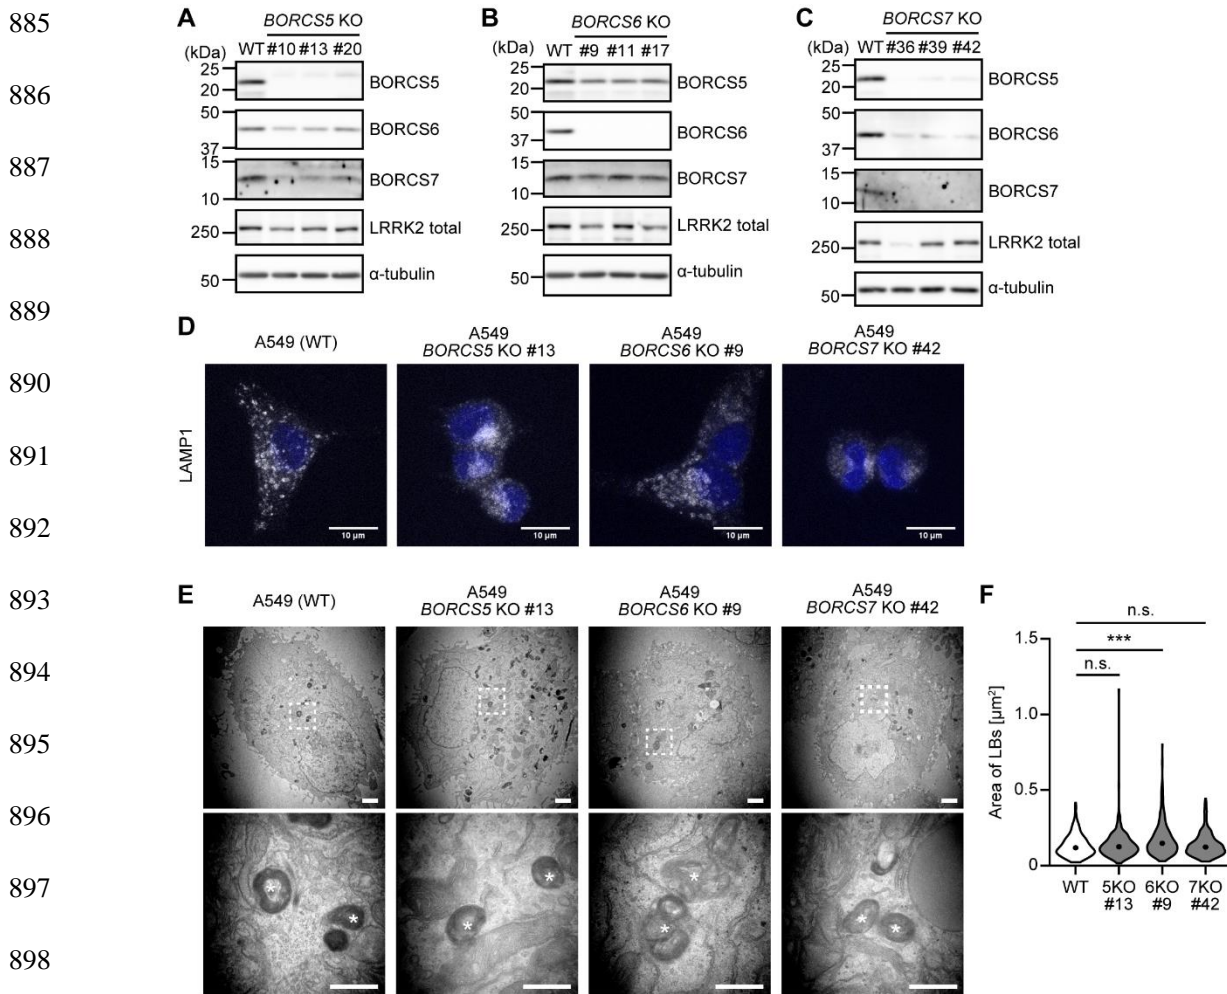

Figure 6

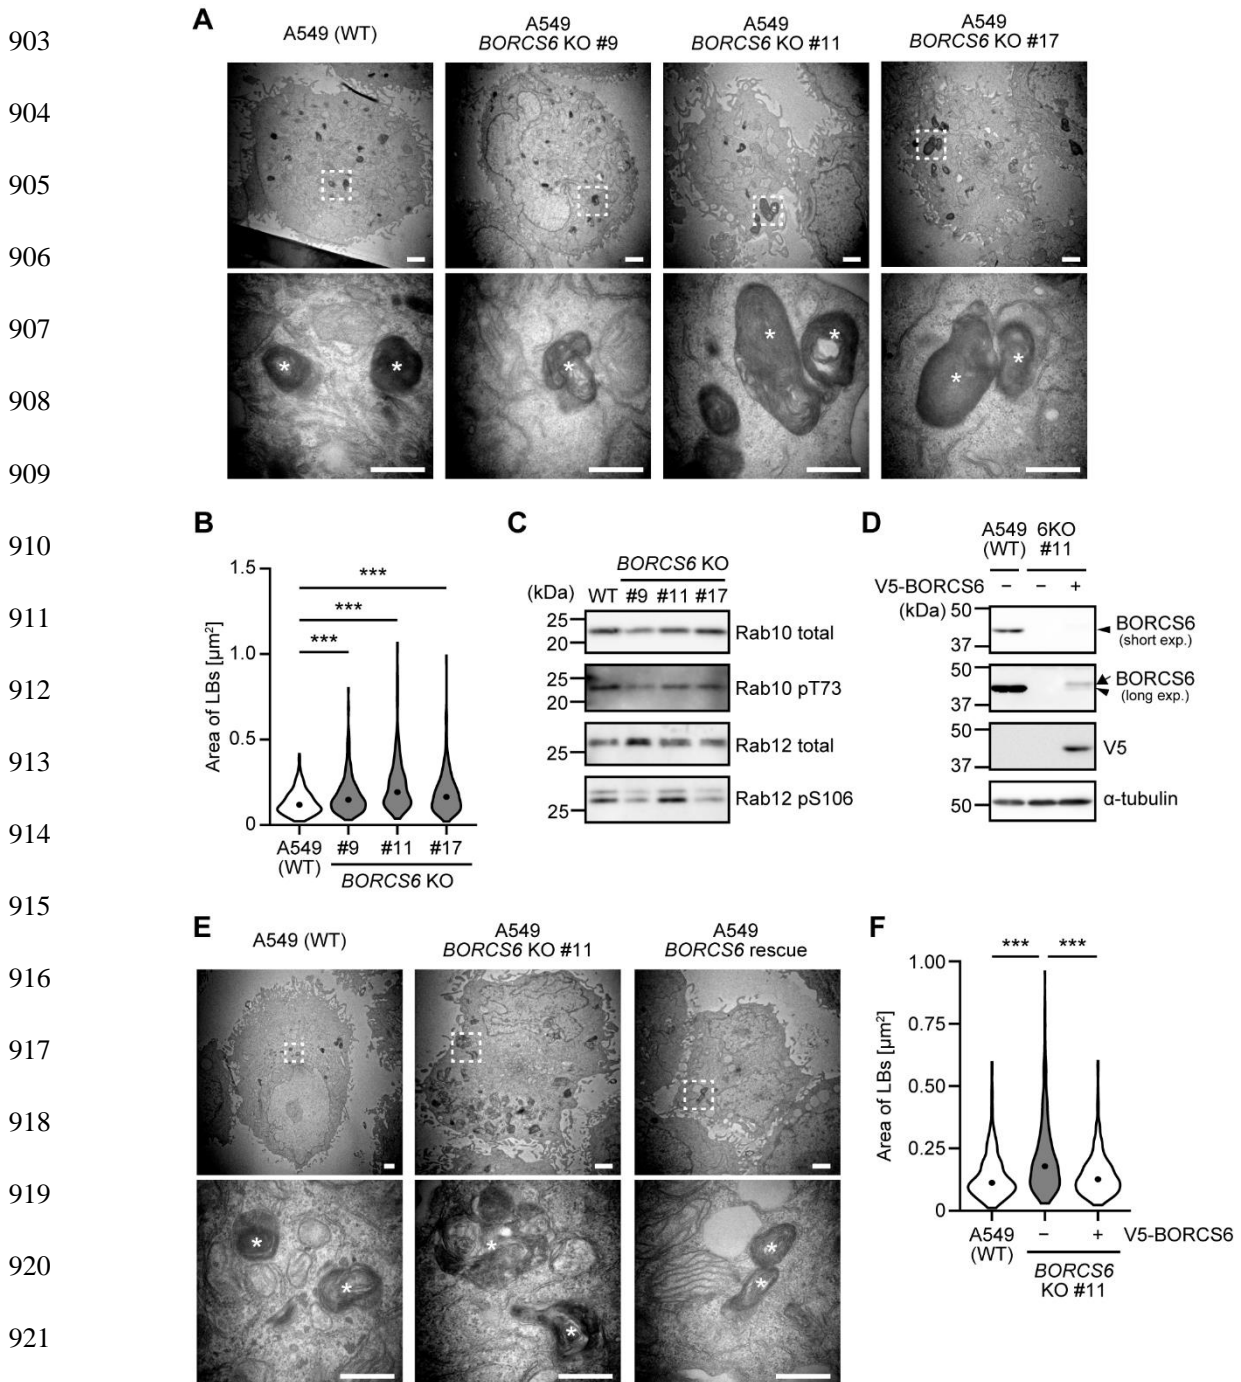

Figure 7

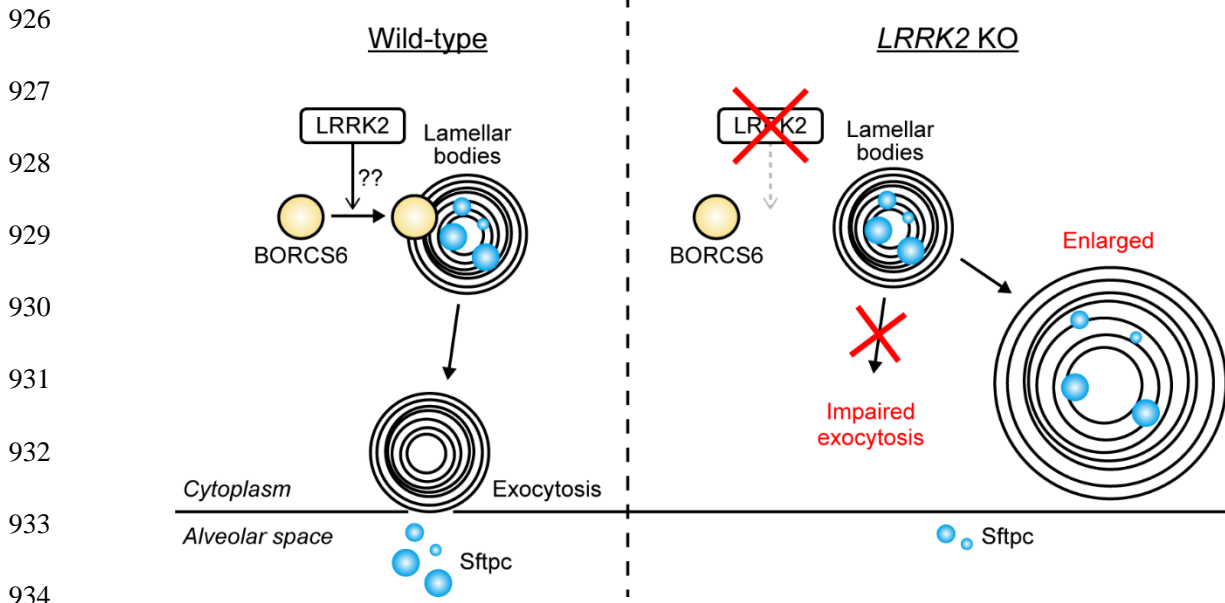

Figure 8
